# Supplementary material for: Novel and prevalent non-East Asian ALDH2 variants; Implications for global susceptibility to aldehydes’ toxicity
Source: PubMed Central journal article supplement — eBioMedicine. 2020 May 8;55:102753. doi: 10.1016/j.ebiom.2020.102753 (PMC7218264; doi:10.1016/j.ebiom.2020.102753), 2020-05-08
Supplement: mmc3.pdf [file mmc3.pdf]

### A Cellular toxicity

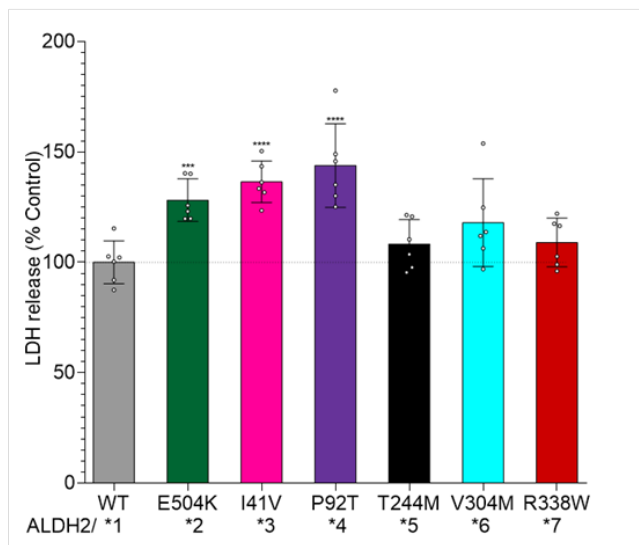

### B 4-HNE protein adducts

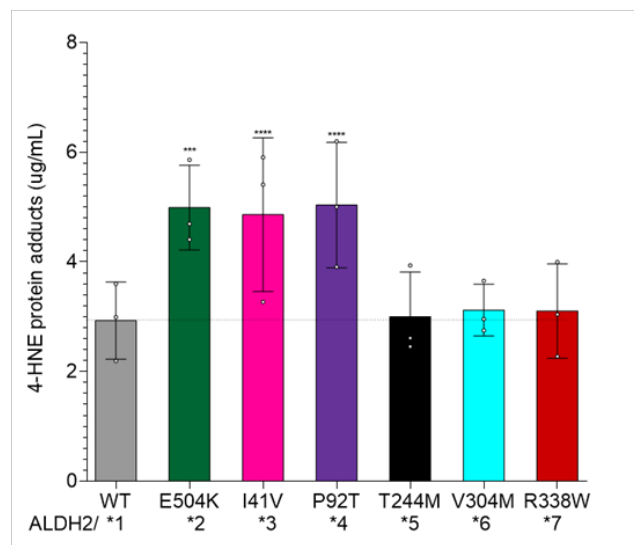

### C Cellular ATP – Ethanol sensitivity

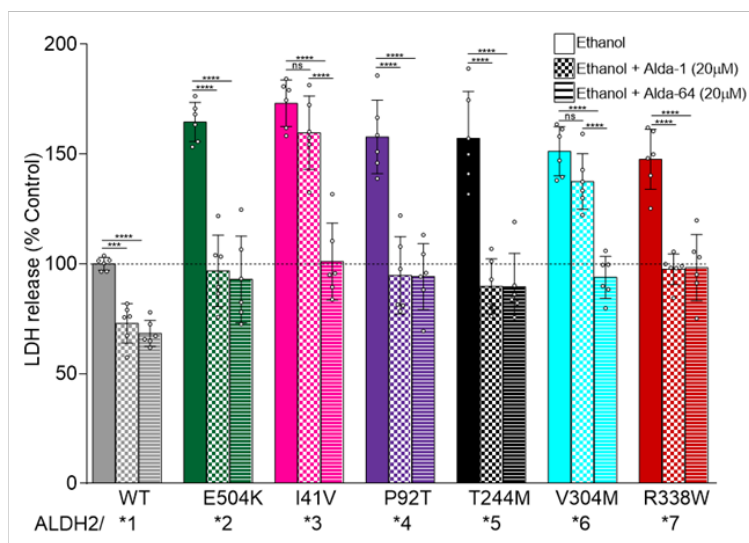

**Fig S1. Human-derived fibroblasts overexpressing novel ALDH2 mutant are sensitive to ethanol**

**toxicity.** (A) Lactate dehydrogenase activity in supernatant in transiently transfected human-derived fibroblasts (n=6); Mean, standard deviation, probability by one-way ANOVA (with Fischer's LSD post hoc test) \*\*\*\* p-value <.0001; \*\*\* p-value <.001; (B) 4-HNE protein adducts in transiently transfected human-derived fibroblasts (n=3); Mean, standard deviation, probability by one-way ANOVA (with Fischer's LSD post hoc test) \*\*\* p-value <.001. (C) Lactate dehydrogenase activity in supernatant in transiently transfected human-derived fibroblasts in the presence or absence of Alda-1/ Alda-64 (20 µM/24 h; 50 mM Ethanol) (n=6); Mean, standard deviation, probability by one-way ANOVA (with Fischer's LSD post hoc test) \*\*\*\* p-value <.0001; \*\*\* p-value <.001.
